# Supplementary material for: Going beyond established model systems of Alzheimer’s disease: companion animals provide novel insights into the neurobiology of aging
Source: PubMed Central journal article supplement (PMC10284893; doi:10.1038/s42003-023-05034-3), 2023-06-21
Supplement: 42003_2023_5034_MOESM1_ESM.pdf [file 42003_2023_5034_MOESM1_ESM.pdf]

1 **Supplementary Information**

2

3 **Supplementary Methods**

4 We describe the sources of the data used to assess relative usage of model systems (Figure 3) as  
5 well as the variation in maximum lifespan across species (Figure 5).

6

7 *Relative usage of model systems*

8 Data on the relative usage of different model systems are extracted from the National Library of  
9 Medicine (NCBI) (<https://pubmed.ncbi.nlm.nih.gov/>). We used keywords and extracted the  
10 number of articles downloaded from NCBI (Figure 3). We used these data as an index of model  
11 system usage.

12

13 *Relative lifespan extension in model systems*

14 The AnAge database includes information on the maximum recorded lifespan in different  
15 species<sup>1</sup>. We used the AnAge database (<https://genomics.senescence.info/species/index.html>) to  
16 assess whether there is evidence of extensions in maximum life span across select species  
17 (Figure 5). We compared the maximum lifespan of the domesticated species relative to other  
18 species within their genus or family. Specifically, we divided the maximum lifespan of  
19 domesticated species relative to the average maximum lifespans of other species within the same  
20 genus or family. A value greater than 1 means that the domesticated species has a relatively  
21 extended lifespan relative to other species within the same genus or family. As an example, we  
22 computed the relative maximum lifespan of humans relative to the average lifespans of great  
23 apes (n=5 species; Figure 5b) to assess whether the maximum lifespan is relatively extended in

24 humans relative to other great apes. The number of species for each taxonomic group are shown  
25 in Figure 5.

26

### 27 *Neuropathologies across species*

28 We performed a literature search to assess the prevalence of neuropathologies across humans,  
29 companion animal models, and wildlife carnivore species (i.e., sea lions, bears). We extracted  
30 demographic data including age, sample size, location, and number of individuals showing brain  
31 plaques, tangles, and cerebral angiopathology. The inclusion of wild-life carnivore species  
32 permits testing whether neuropathologies are exclusive to domesticated companion animals or  
33 whether these pathologies are general to carnivore species. We include a condensed version of  
34 our literature search in Supplementary Table 2-3.

35 We collated information across studies. We extracted the age and incidence of individuals  
36 with neuropathologies. These methods and samples (age, health status) used vary across studies.  
37 We specify some medical conditions, including cognitive dysfunction syndrome (CDS), Down  
38 syndrome (DS), and neurodegenerative disorders (Supplementary Table 2-3) because these  
39 clinical diagnoses should impact the age and relative number of individuals with AD-like  
40 neuropathologies. Not every study included detailed information about clinical diagnoses in their  
41 reports and that studies vary in the level of detail with which they reported demographic data.  
42 Variation in methods and samples used across studies may contribute to variation in estimated  
43 age of onset and prevalence of neuropathologies across species. It is for these reasons that we  
44 focus on large trends across studies.

45

46 47 **Supplementary References**

- 47 1. Tacutu, R. *et al.* Human ageing genomic resources: integrated databases and tools for the  
48 biology and genetics of ageing. *Nucleic Acids Res.* **41**, D1027-D1033 (2013).
