# Supplementary material for: Going beyond established model systems of Alzheimer’s disease: companion animals provide novel insights into the neurobiology of aging
Source: PubMed Central journal article supplement (PMC10284893; doi:10.1038/s42003-023-05034-3), 2023-06-21
Supplement: 42003_2023_5034_MOESM2_ESM.pdf [file 42003_2023_5034_MOESM2_ESM.pdf]

## Description of Additional Supplementary Files

**File name:** Supplementary Data 1

**Description:** Domestication terminology and species information.

**File name:** Supplementary Data 2

**Description:** Neuropathologies and demographic information across humans, companion animals, and other carnivore species (shortened version).

**File name:** Supplementary Data 3

**Description:** Neuropathologies and demographic information across humans, companion animals, and other carnivore species (extended version).
